# Supplementary material
Source: publisher site journal article supplement (https://www.dovepress.com/get_supplementary_file.php?f=415349.docx)
Supplement: Supplementary file 1 [file get_supplementary_file.php]

**Appendix 1: Medical Staff Occupational Stress Scale**

| **Stressor** | **Frequency** | | | | | **Mental pressure** | | | | |
| --- | --- | --- | --- | --- | --- | --- | --- | --- | --- | --- |
| Not occurred | Encountered | | | | None | Mild | Moderate | Severe | Extremely  severe |
| Rarely | Some-  times | Often | Almost  Every-  day |
| 1. Parents divorced during childhood. |  |  |  |  |  |  |  |  |  |  |
| 2. Peer bullying in childhood. |  |  |  |  |  |  |  |  |  |  |
| 3. Experienced natural disaster in childhood （earthquake, tsunami, typhoon）. |  |  |  |  |  |  |  |  |  |  |
| 4. Severe starvation in childhood. |  |  |  |  |  |  |  |  |  |  |
| 5. Witnessed family violence in childhood. |  |  |  |  |  |  |  |  |  |  |
| 6. Lack of advanced medical equipment for diagnosis |  |  |  |  |  |  |  |  |  |  |
| 7. Poor treatment effect. |  |  |  |  |  |  |  |  |  |  |
| 8. Too few outpatients. |  |  |  |  |  |  |  |  |  |  |
| 9. Overcrowding of outpatients. |  |  |  |  |  |  |  |  |  |  |
| 10. Infection in the workplace. |  |  |  |  |  |  |  |  |  |  |
| 11. Difficulty completing work tasks with high quality. |  |  |  |  |  |  |  |  |  |  |
| 12. Patients deliberately conceal their condition. |  |  |  |  |  |  |  |  |  |  |
| 13. Infectious diseases detected. |  |  |  |  |  |  |  |  |  |  |
| 14. Infectious disease outbreaks. |  |  |  |  |  |  |  |  |  |  |
| 15. Patients with infectious diseases admitted to outpatient clinic. |  |  |  |  |  |  |  |  |  |  |
| 16. Treatment of hospitalized patients with infectious diseases. |  |  |  |  |  |  |  |  |  |  |
| 17. Patient’s malicious transmission of virus (infectious patients spitting on medical staff). |  |  |  |  |  |  |  |  |  |  |
| 18. Tension with colleagues. |  |  |  |  |  |  |  |  |  |  |
| 19. Verbal or physical conflict with colleagues. |  |  |  |  |  |  |  |  |  |  |
| 20. Minor physical conflict with patient/family. |  |  |  |  |  |  |  |  |  |  |
| 21. Physical aggression (spitting, biting, pushing, hitting) by patient/family. |  |  |  |  |  |  |  |  |  |  |
| 22. Violent attack from patient/family causing injury and disability. |  |  |  |  |  |  |  |  |  |  |
| 23. Patient/family verbal harassment. |  |  |  |  |  |  |  |  |  |  |
| 24. Patient/family member physical sexual harassment |  |  |  |  |  |  |  |  |  |  |
| 25. Subordinates do not obey work arrangements. |  |  |  |  |  |  |  |  |  |  |
| 26. Professional updated learning. |  |  |  |  |  |  |  |  |  |  |
| 27. Teaching work inspection. |  |  |  |  |  |  |  |  |  |  |
| 28. Professional English needs to be learned. |  |  |  |  |  |  |  |  |  |  |
| 29. The school has high requirements for teaching work. |  |  |  |  |  |  |  |  |  |  |
| 30. Writing academic paper. |  |  |  |  |  |  |  |  |  |  |
| 31. Paper submission rejected. |  |  |  |  |  |  |  |  |  |  |
| 32. Apply for scientific project. |  |  |  |  |  |  |  |  |  |  |
| 33. Lack of research funding. |  |  |  |  |  |  |  |  |  |  |
| 34.Not understood by the patient or their family. |  |  |  |  |  |  |  |  |  |  |
| 35.The patient (or their family) does not trust or obey the treatment plan. |  |  |  |  |  |  |  |  |  |  |
| 36.Poor patient compliance. |  |  |  |  |  |  |  |  |  |  |
| 37.Argument with patient/family. |  |  |  |  |  |  |  |  |  |  |
| 38.Patient/family members are indifferent and frigid in manners. |  |  |  |  |  |  |  |  |  |  |
| 39.Patient/family verbal threats or abuse. |  |  |  |  |  |  |  |  |  |  |
| 40.Different from the management philosophy of the superior. |  |  |  |  |  |  |  |  |  |  |
| 41.Wronged by superiors. |  |  |  |  |  |  |  |  |  |  |
| 42.Admonished by superiors. |  |  |  |  |  |  |  |  |  |  |
